# Supplementary material for: Comparative study of the strongest solid Lewis acids known: ACF andHS-AlF3
Source: Royal Society of Chemistry journal article supplement (doi:10.1039/c8dt03279c), 2018-01-01
Supplement: c8dt03279c1.pdf [file c8dt03279c1.pdf]

## Supporting Information for

# Comparative Study of the Strongest Solid Lewis Acids Known: ACF and $HS-AlF_3$

Beatriz Calvo<sup>a+</sup>, Clara Patricia Marshall<sup>ab+</sup>, Thoralf Krahl<sup>ac</sup>, Jutta Kröhnert<sup>d</sup>, Annette Trunschke<sup>d</sup>, Gudrun Scholz<sup>a</sup>, Thomas Braun<sup>a\*</sup>, and Erhard Kemnitz<sup>ac\*</sup>

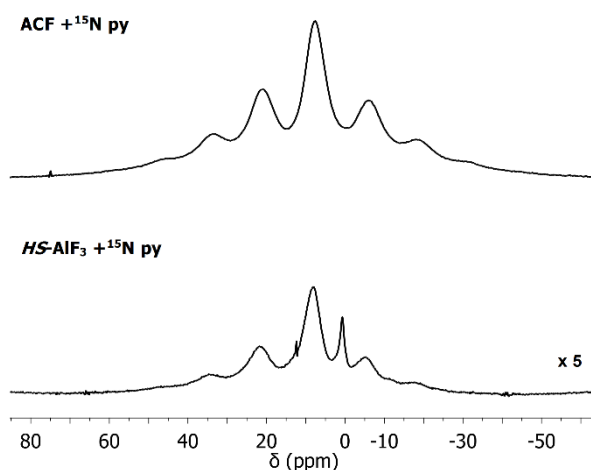

**Figure S1.**  $^1H$  MAS NMR spectra of ACF plus pyridine (top) and  $HS-AlF_3$  plus pyridine (bottom); rotation frequency of 5 kHz,  $p1 = 6.5 \mu s$  @ 8,5 db

### Simulation by dmfit

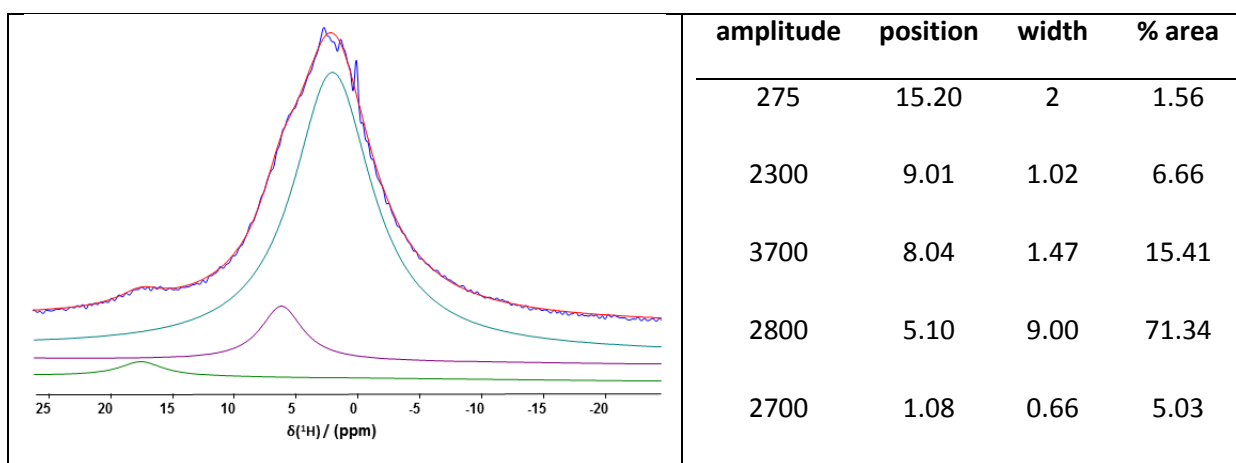

**Figure S2.** Top blue trace corresponds to the measured  $^1H$  MAS NMR spectrum of ACF; subsequent traces are “dmfit” simulated spectra: in red the simulation of the full spectrum; in purple, green and blue the different contributions of the material.

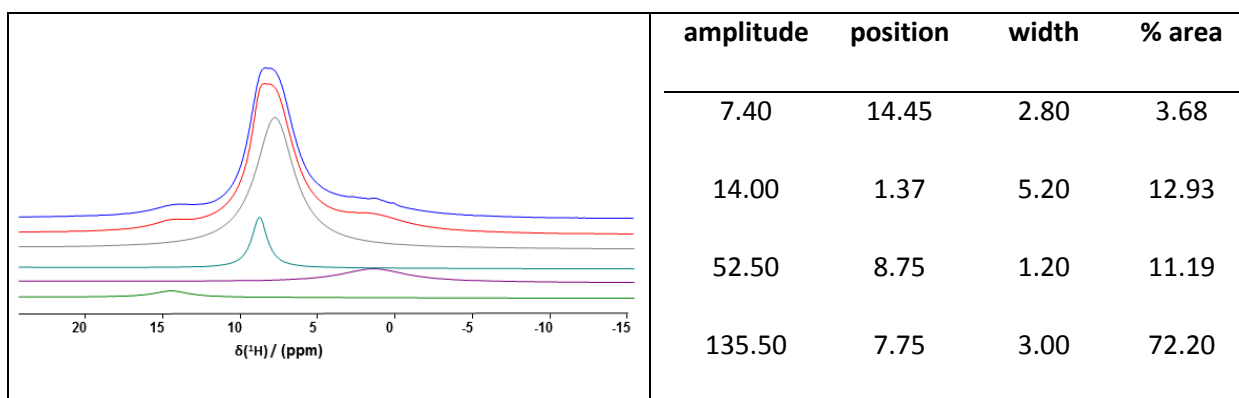

**Figure S3.** Top blue trace corresponds to the measured  $^1\text{H}$  MAS NMR spectrum of  $\text{ACF}+^{15}\text{N}$ -pyridine; subsequent traces are “dmfit” simulated spectra: in red the simulation of the full spectrum; in purple the different contributions of the ACF; in green contribution of the Brønsted acid sites ( $^+\text{H-NC}_5\text{H}_5$ ), blue and grey the contributions of the aromatic protons of pyridine and pyridinium.

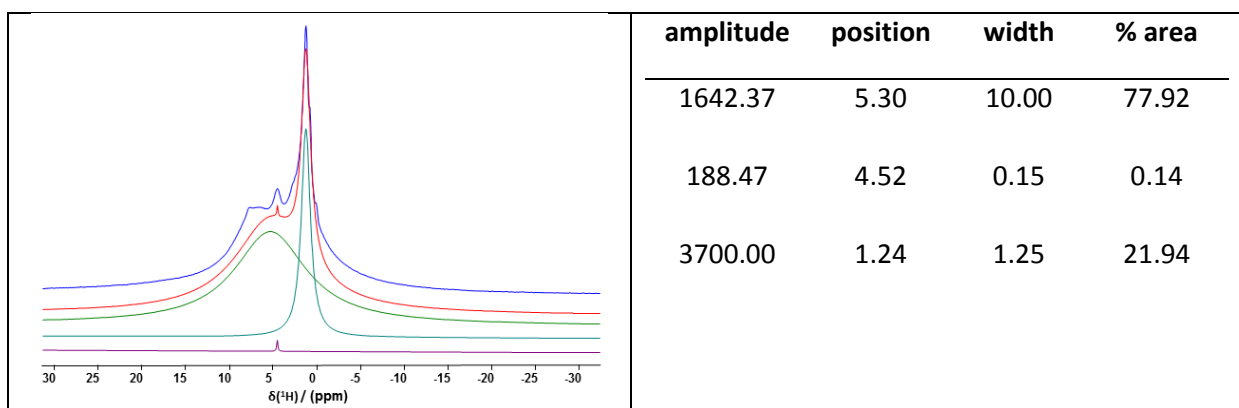

**Figure S4.** top blue trace corresponds to the measured  $^1\text{H}$  MAS NMR spectrum of  $\text{HS-AlF}_3$ ; subsequent traces are “dmfit” simulated spectra: in red the simulation of the full spectrum; in purple, green and blue the different contributions of the material.

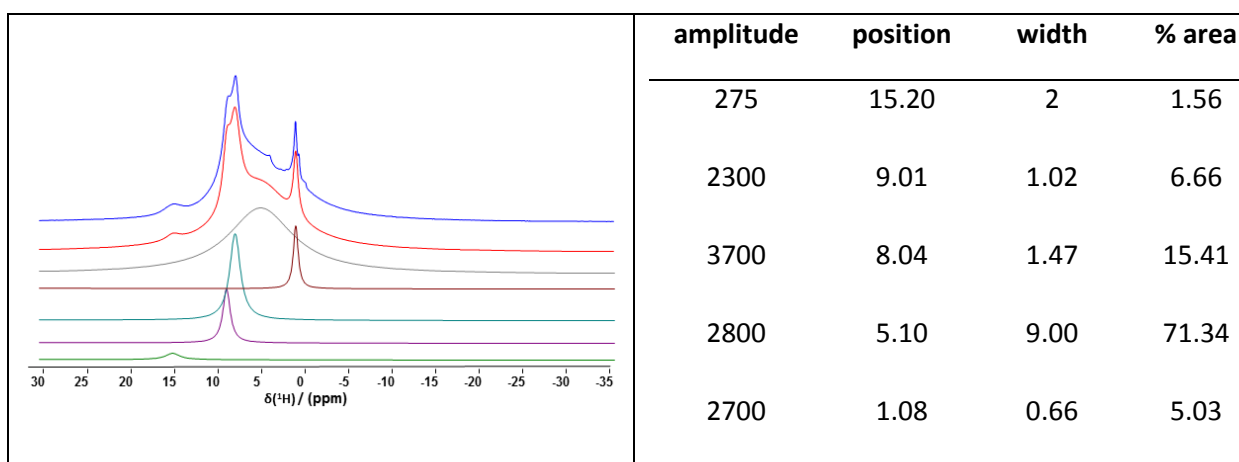

**Figure S5.** top blue trace corresponds to the measured  $^1\text{H}$  MAS NMR spectrum of  $\text{HS-AlF}_3+^{15}\text{N}$ -pyridine; subsequent traces are “dmfit” simulated spectra: in red the simulation of the full spectrum; in purple the different contributions of the ACF; in green contribution of the Brønsted acid sites ( $^+\text{H-NC}_5\text{H}_5$ ), blue and grey the contributions of the aromatic protons of pyridine and pyridinium.

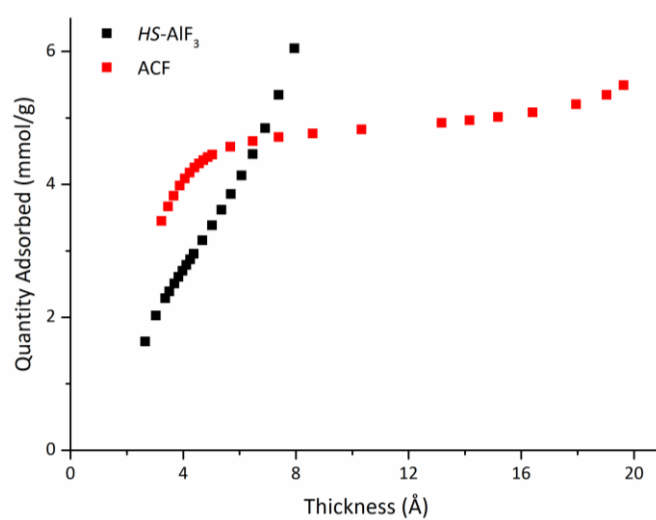

**Figure S6.** t-plots for ACF and *HS-AIF<sub>3</sub>*, considering the calculations of Harkins and Jura (see References).
